# Supplementary material for: Functional Analysis of the Unique Cytochrome P450 of the Liver Fluke Opisthorchis felineus
Source: PubMed Central journal article supplement (PMC4666407; doi:10.1371/journal.pntd.0004258), 2015-12-01

control

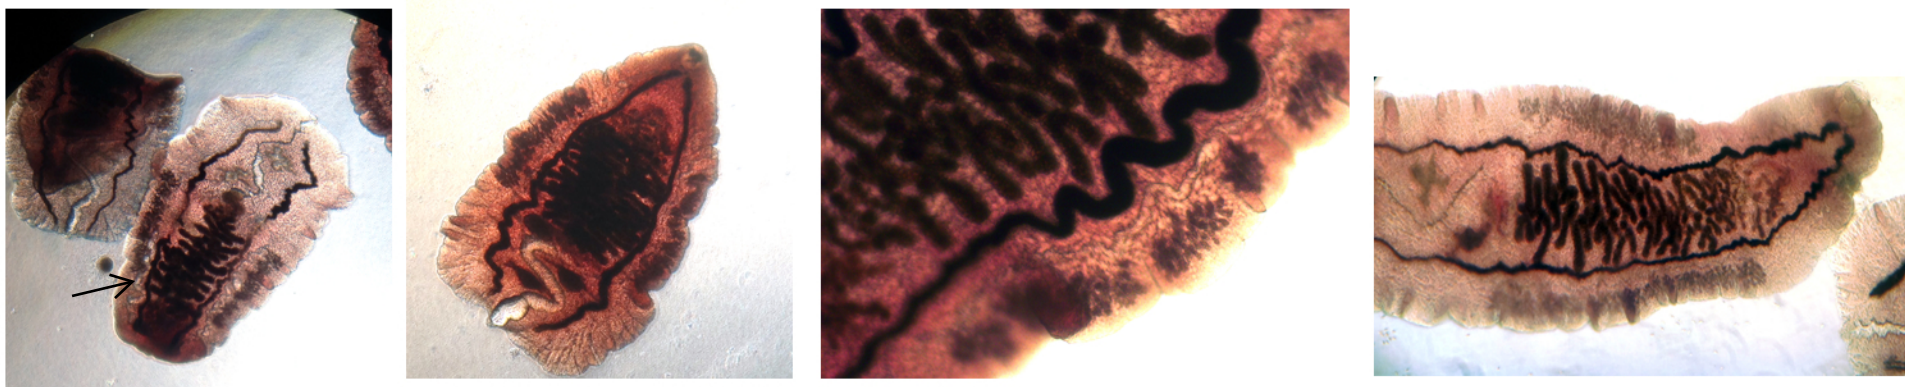

mock control

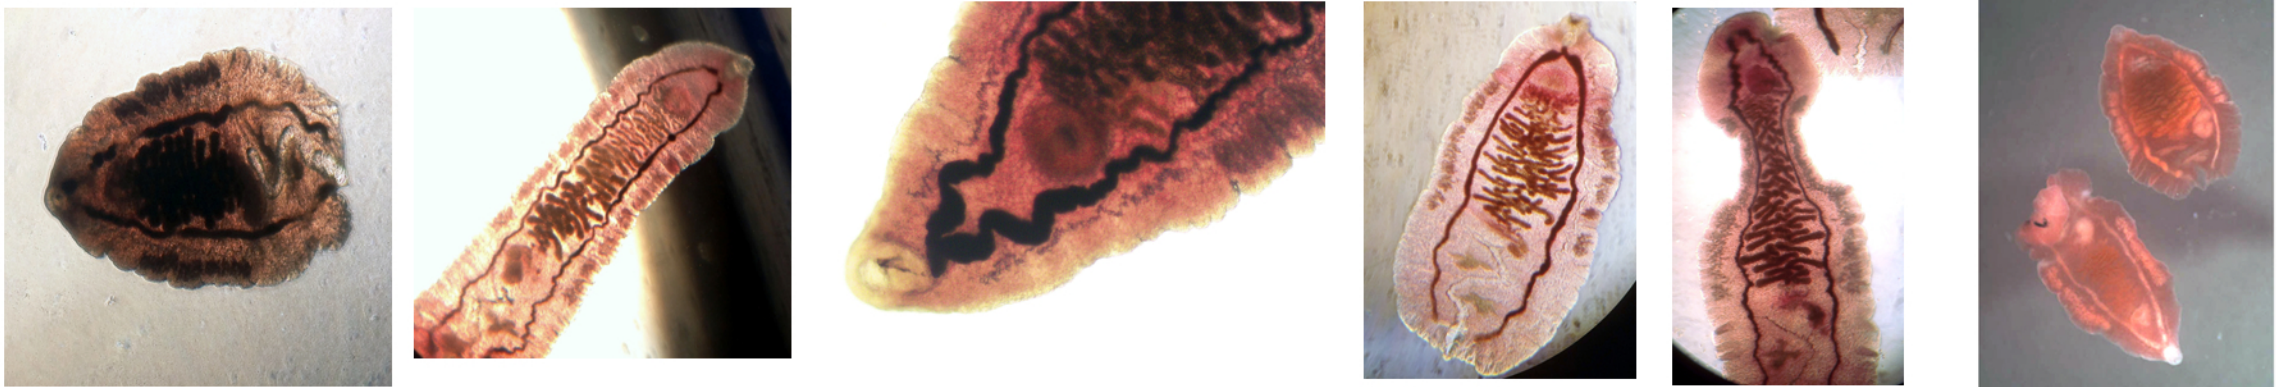

LUC control

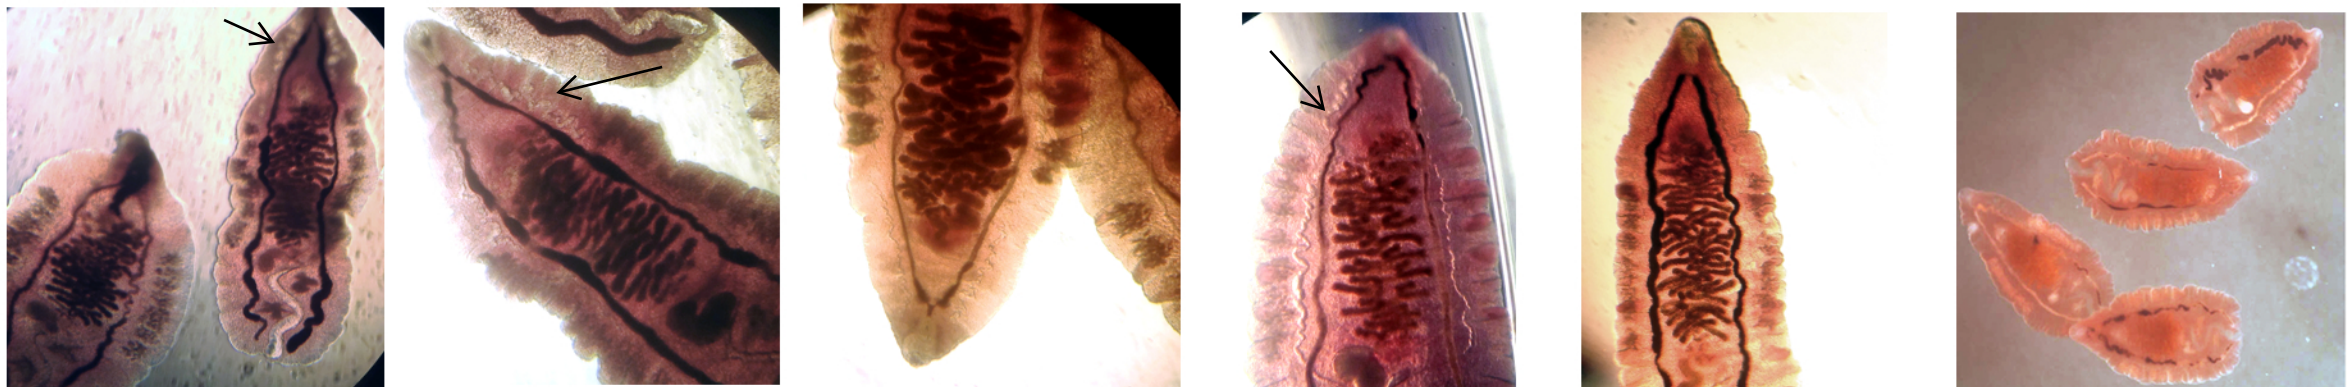

CYP

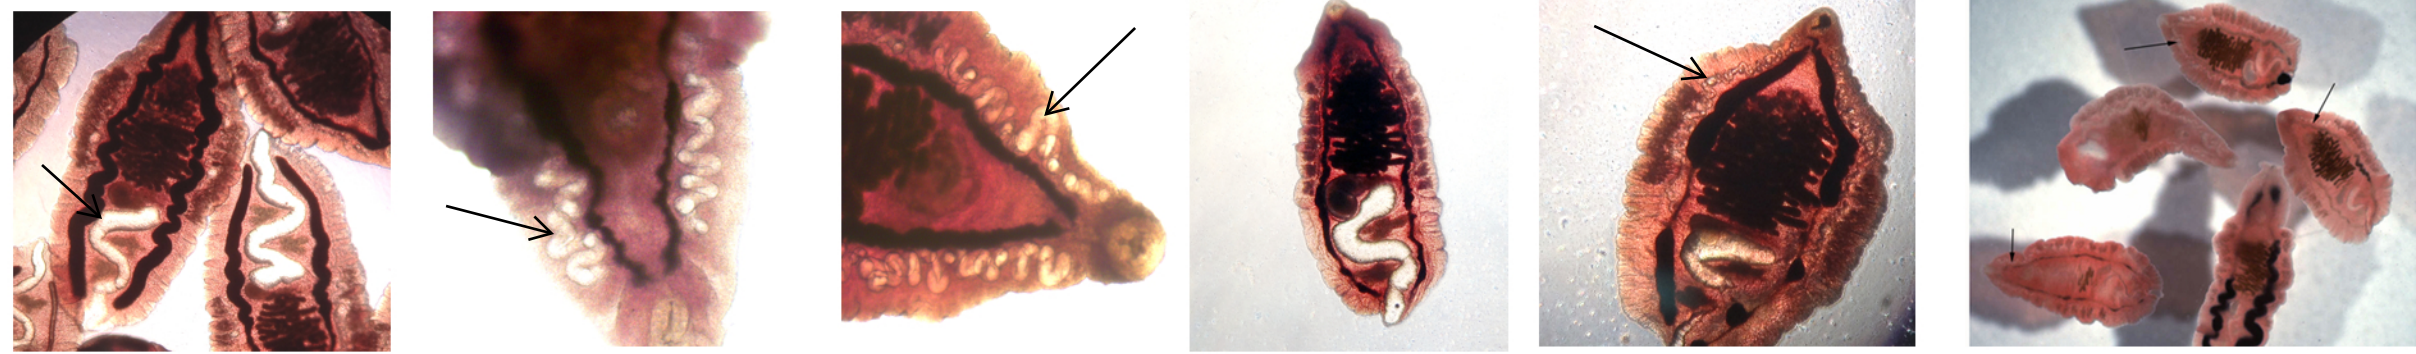

keto

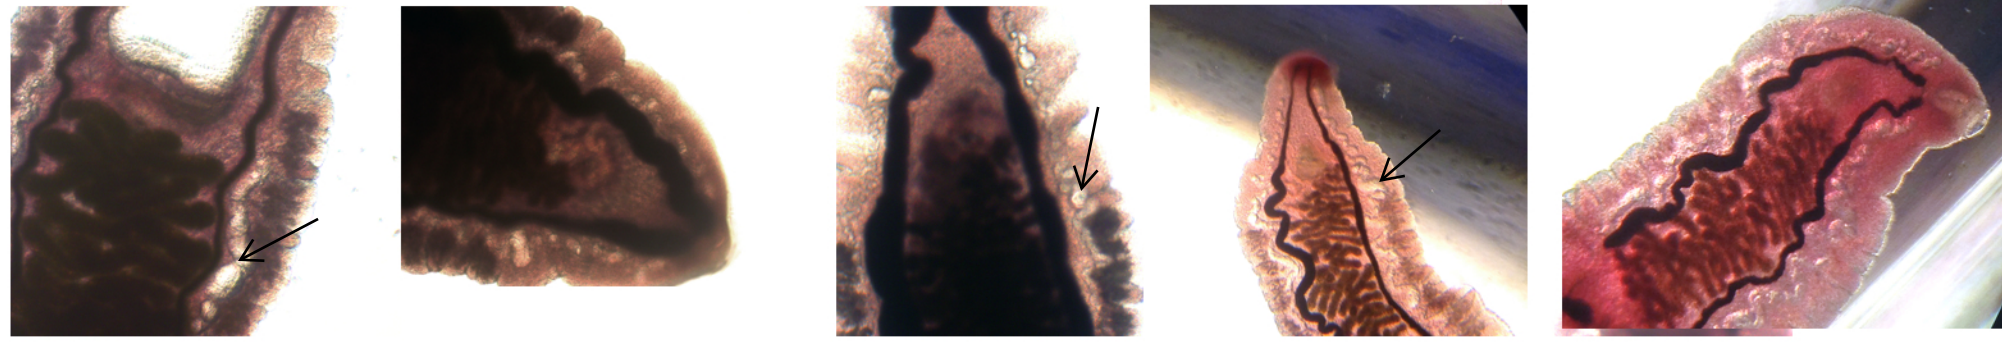

Supplement: pntd.0004258.s004.pdf [file pntd.0004258.s004.pdf]
